# Supplementary material for: Global changes in oceanic mesoscale currents over the satellite altimetry record
Source: Research Square preprint supplement (doi:10.21203/rs.3.rs-88932/v1), 2020-10-20
Supplement: Supplementary file 1 [file 1549beabad582cab95671e38.pdf]

# Supplementary information: Global strengthening of oceanic mesoscale currents over the satellite altimetry record

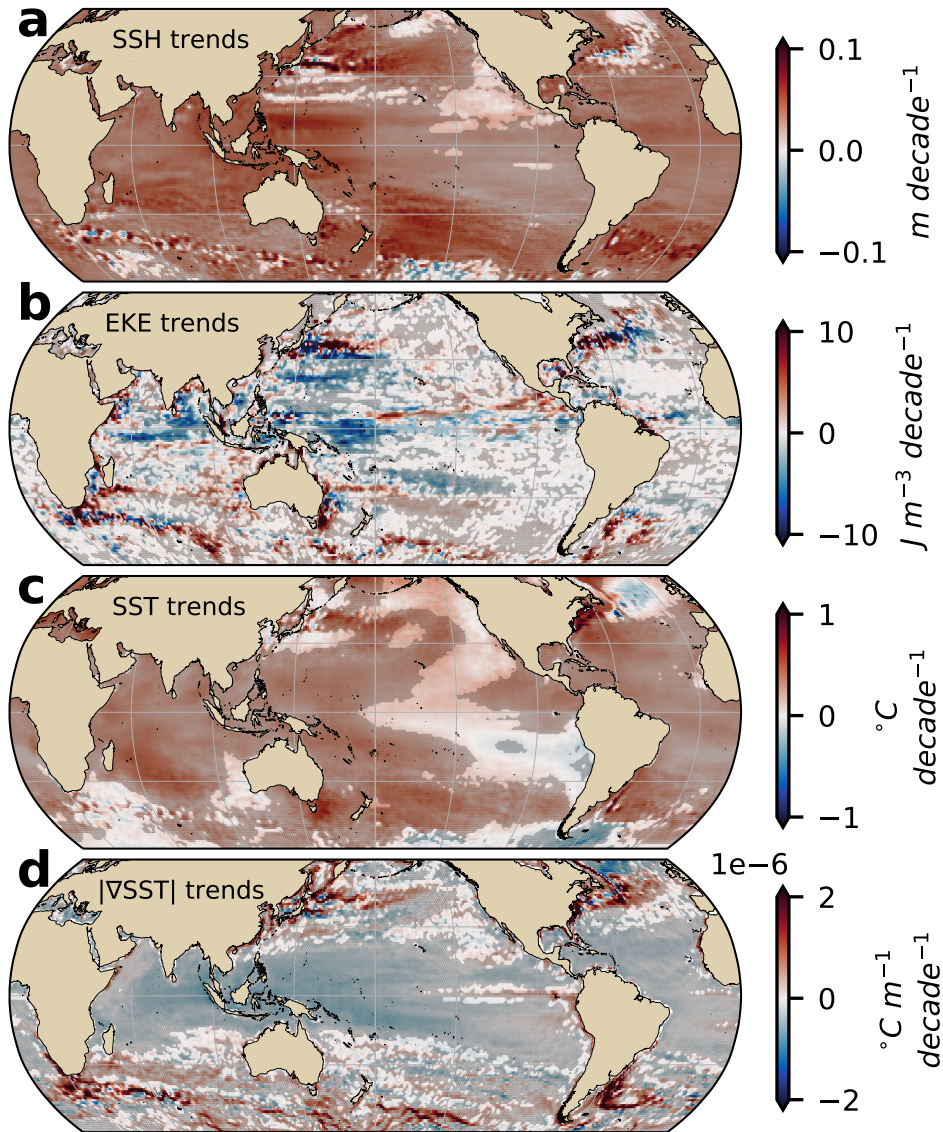

**Figure S1** Regions of significant trends of (a) Sea Level Height; (b) Eddy Kinetic Energy; (c) Sea Surface Temperature; (d) Sea Surface Temperature Gradient. As per Fig.1, 2 in main manuscript, but showing in gray stippling regions that are significant above the 95% confidence level.

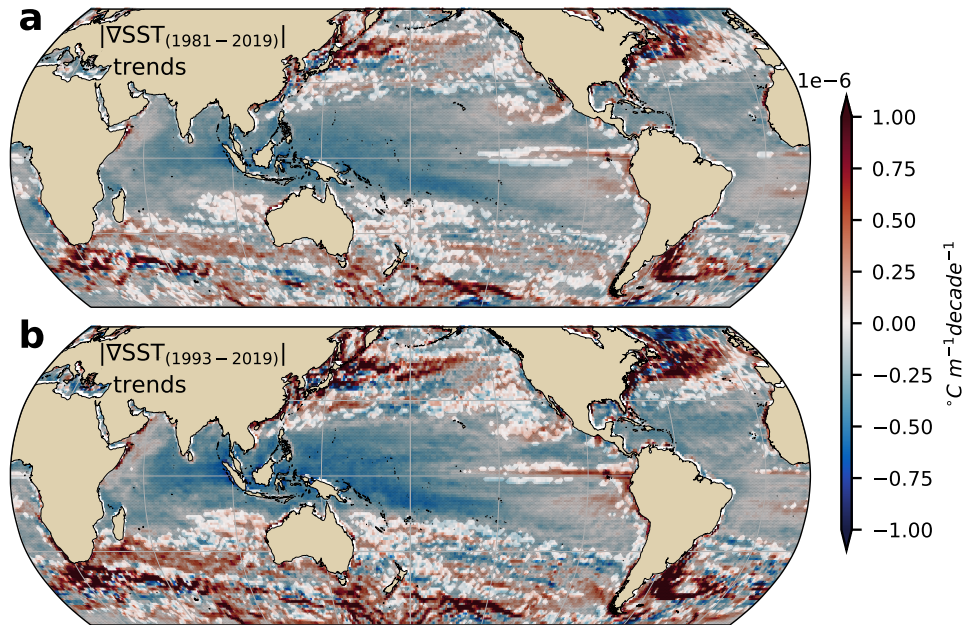

**Figure S2 Sea Surface Temperature Gradient trends for periods between 1981-2019 and 1993-2019.** Gray stippling shows regions that are significant above the 95% confidence level.

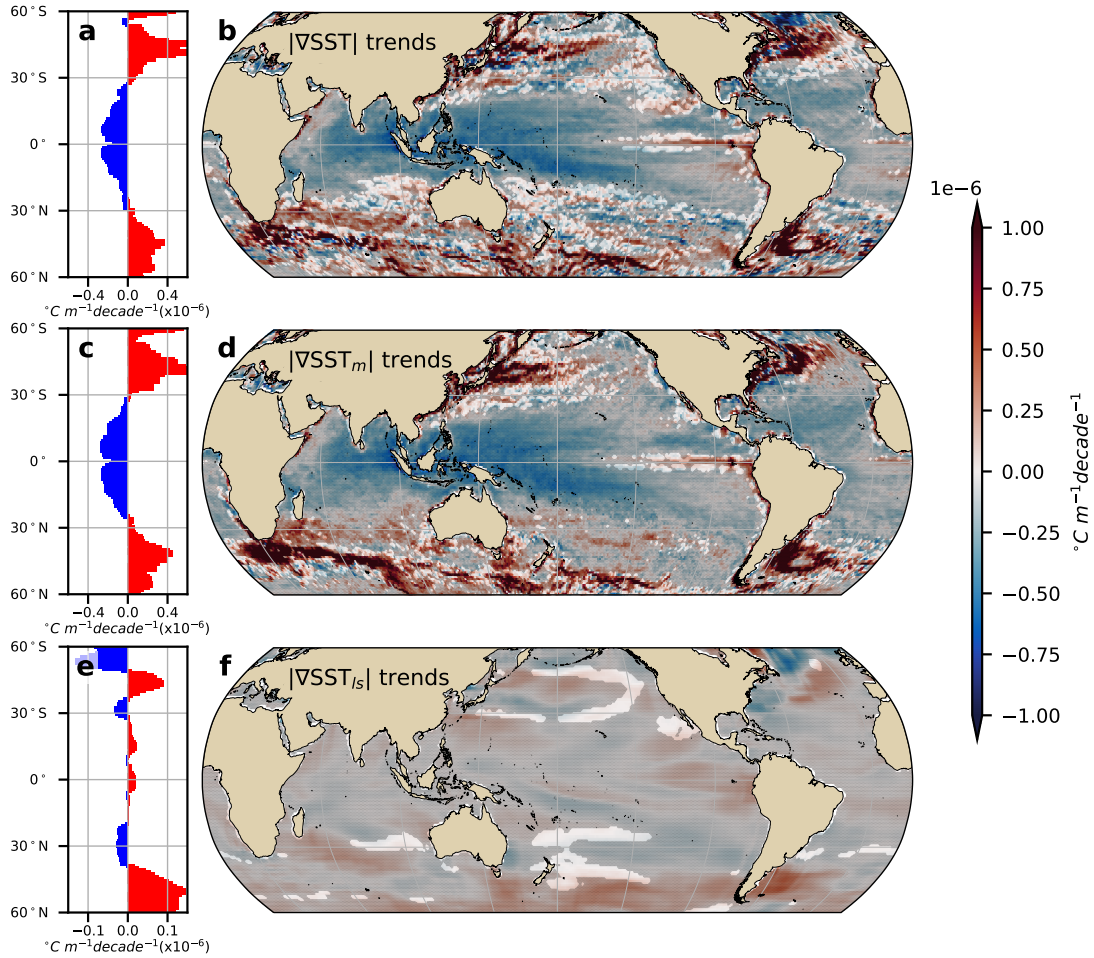

**Figure S3 Sea Surface Temperature gradient trend scale analysis.** Large-scale SST gradients are computed by filtering the SST field with a  $3^\circ$  kernel filter and a running average of 1 year before computing the gradients and their respective trends (See Methods). The small-scale correspond to the gradients of the SST minus the large-scale filtered SST field. (a) Zonally averaged SST gradient trends; (b) map of SST gradient trends; (c) zonally averaged small-scale SST gradient trends; (d) map of small-scale SST gradient trends; (e) zonally averaged large-scale SST gradients trend; (f) map of large-scale SST gradient trends. In panels (b), (d) and (f) gray stippling shows regions where the trends are significant above the 95% confidence level.

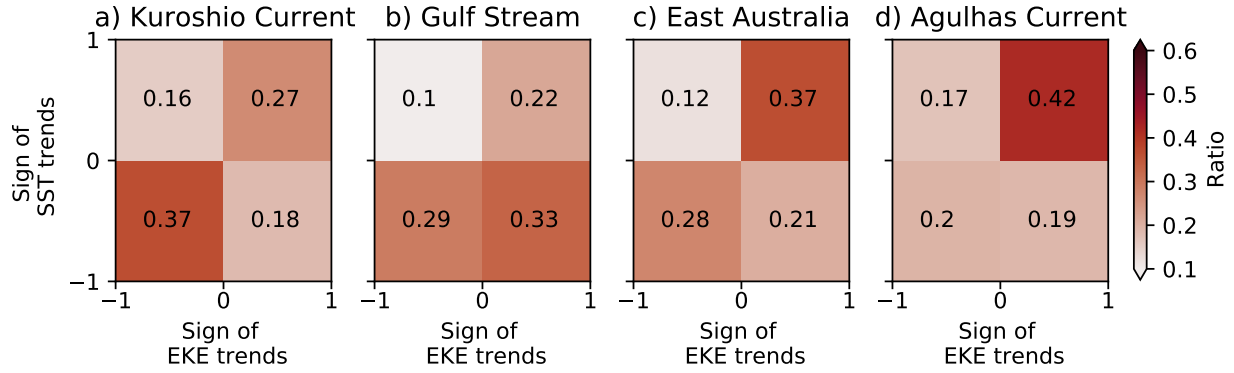

**Figure S4 Regional ratio of mesoscale SST gradient trends and EKE trends signs.** (a) Kuroshio current; (b) Gulf Stream; (c) East Australian current; (d) Agulhas retroflexion. The ratio was computed by integrating the area weighted sign of the SST gradient trends and EKE trends divided by the total area of the region.

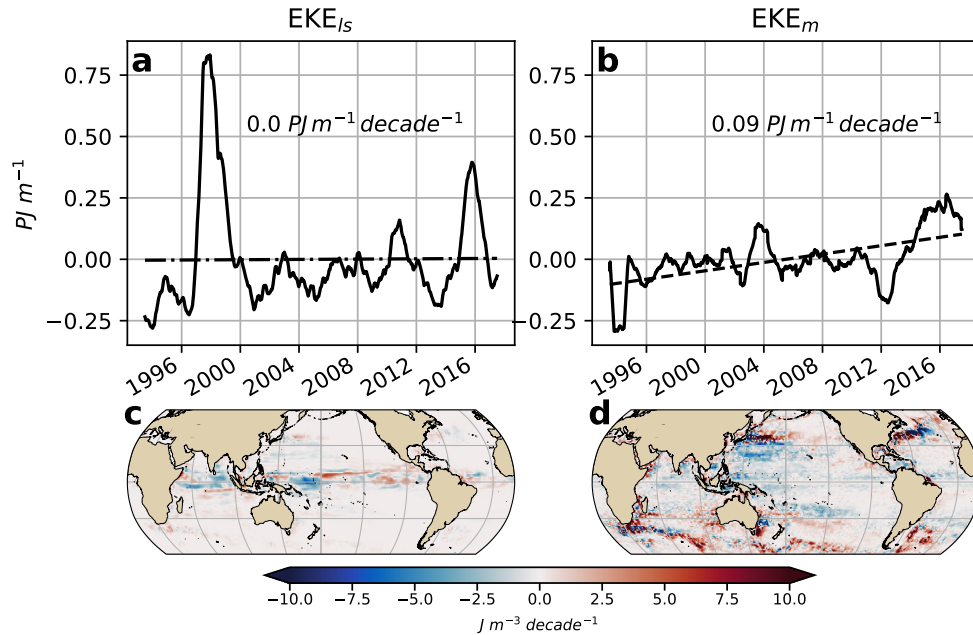

**Figure S5 Eddy Kinetic Energy time series and trends computed from filtered velocities.** Scales larger than typical mesoscale are computed by filtering the velocity fields with a  $3^\circ$  kernel filter ( $u_{ls}$ ), and the smaller scales are calculated from the difference of the velocity fields and the filtered velocity field ( $u_e = u - u_{ls}$ ). Then EKE and their respective trends are computed (See Methods). (a) EKE time series of scales larger than 3 degrees time series; (b) EKE time series of scales smaller than 3 degrees; (c) map of large-scale EKE trends; (d) map of small-scale EKE trends. Text in panels (a) and (b) correspond to trends per decade.

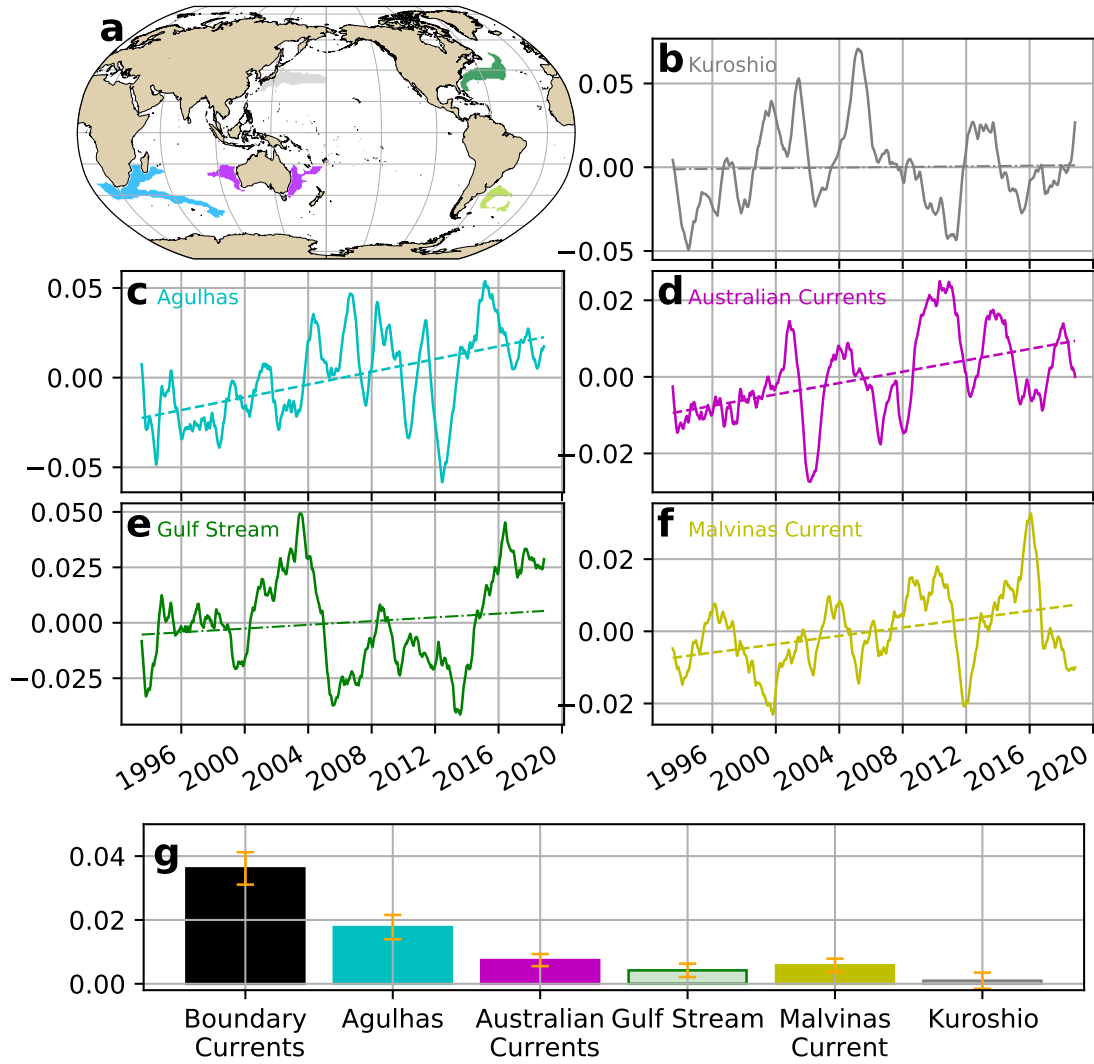

**Figure S6 Time-series and trends of Eddy Kinetic Energy integrated over boundary currents.** (a) Map of boundary current regions defined from climatological mean EKE and time series anomalies ( $PJ m^{-1}$ ) and trends ( $PJ m^{-1} decade^{-1}$ ) for each boundary current : (b) Kuroshio Current; (c) Agulhas Current; (d) East Australian Current and Leeuwin Current; (e) Gulf Stream; (f) Malvinas Current. (g) Linear EKE trends for boundary currents, uncertainties are shown in orange bars and statistically significant trends (above 95% confidence level) denoted with solid bars while non-significant trends are translucent.

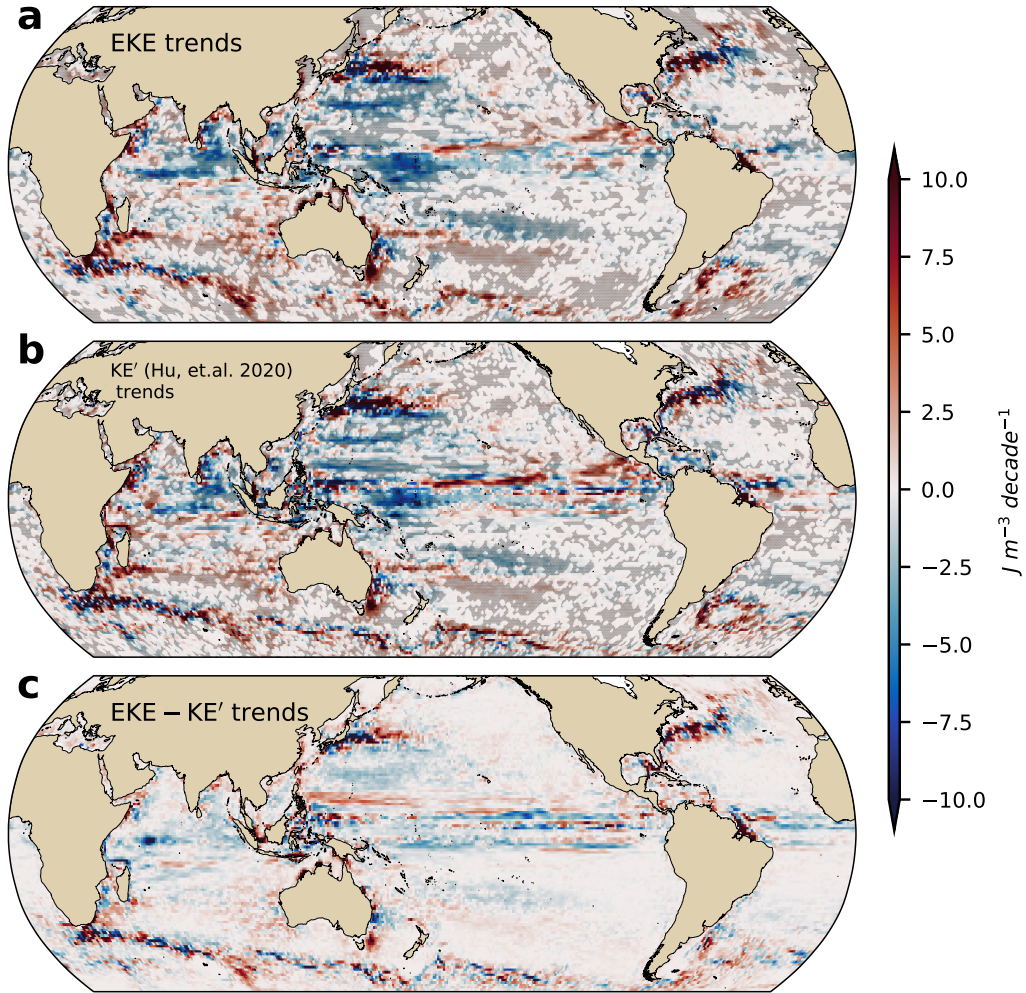

**Figure S7 Comparison of satellite trends using EKE and Kinetic energy anomaly (KE') as computed by Hu et al.** (a) EKE trend map, (b) KE' trend map, and (c) difference between EKE and KE' trends. The difference between the fields is a consequence of the cross terms due to the Reynolds velocity decomposition. In panel (a) and (b) gray stippling shows regions where the trends are significant above the 95% confidence level.
